# Supplementary material
Source: MDPI journal article supplement (https://www.mdpi.com/2075-4442/12/2/46)
Supplement: s1 [file s1]

# **Supplementary Material for: A Classical Molecular Dynamics Study of the Effect of the Atomic Force Microscope Tip Shape, Size and Deformation on the Tribological Properties of the Graphene/Au(111) Interface**

Cem Maden,<sup>†</sup> Hande Ustunel,<sup>\*,‡</sup> and Daniele Toffoli<sup>\*,¶,§</sup>

<sup>†</sup>*Department of Micro and Nanotechnology, Middle East Technical University, Dumlupinar  
Blv 1, 06800, Ankara, Turkey*

<sup>‡</sup>*Department of Physics, Middle East Technical University, 06800, Ankara, Turkey*

<sup>¶</sup>*Dipartimento di Scienze Chimiche e Farmaceutiche, Università degli Studi di Trieste, Via  
L. Giorgieri 1, I-34127, Trieste, Italy*

<sup>§</sup>*IOM-CNR, Istituto Officina dei Materiali-CNR, S.S.14, km 163.5, 34149 Trieste, Italy*

E-mail: [ustunel@metu.edu.tr](mailto:ustunel@metu.edu.tr); [toffoli@units.it](mailto:toffoli@units.it)

# S1 Lateral friction forces as a function of sliding distance

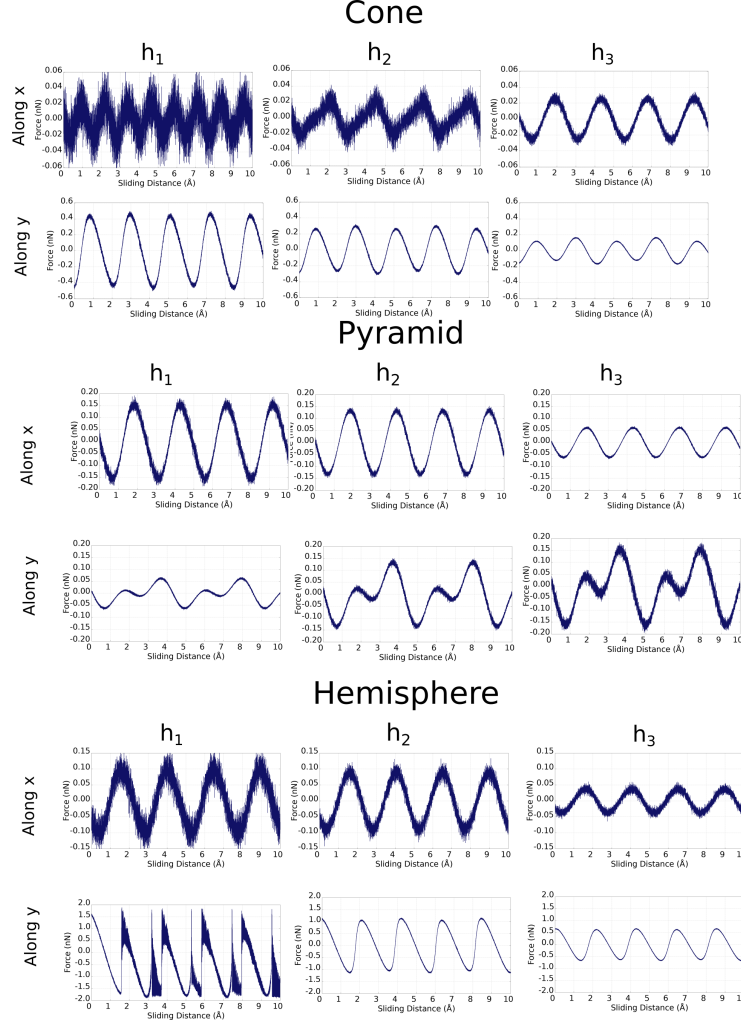

Figure S1: Lateral friction force as a function of sliding distance along the x and y directions at  $T=1$  K. From top to bottom, the forces for the rigid cone, the rigid pyramid and the rigid hemisphere are presented.

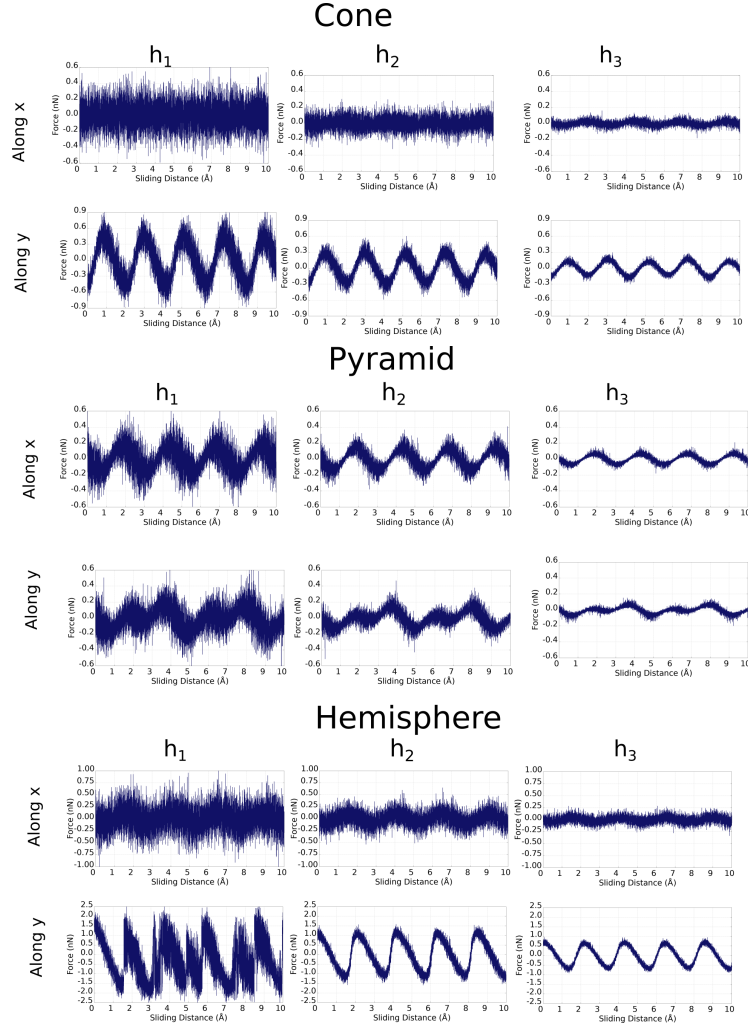

Figure S2: Lateral friction force as a function of sliding distance along the x and y directions at  $T=100$  K. From top to bottom, the forces for the rigid cone, the rigid pyramid and the rigid hemisphere are presented.

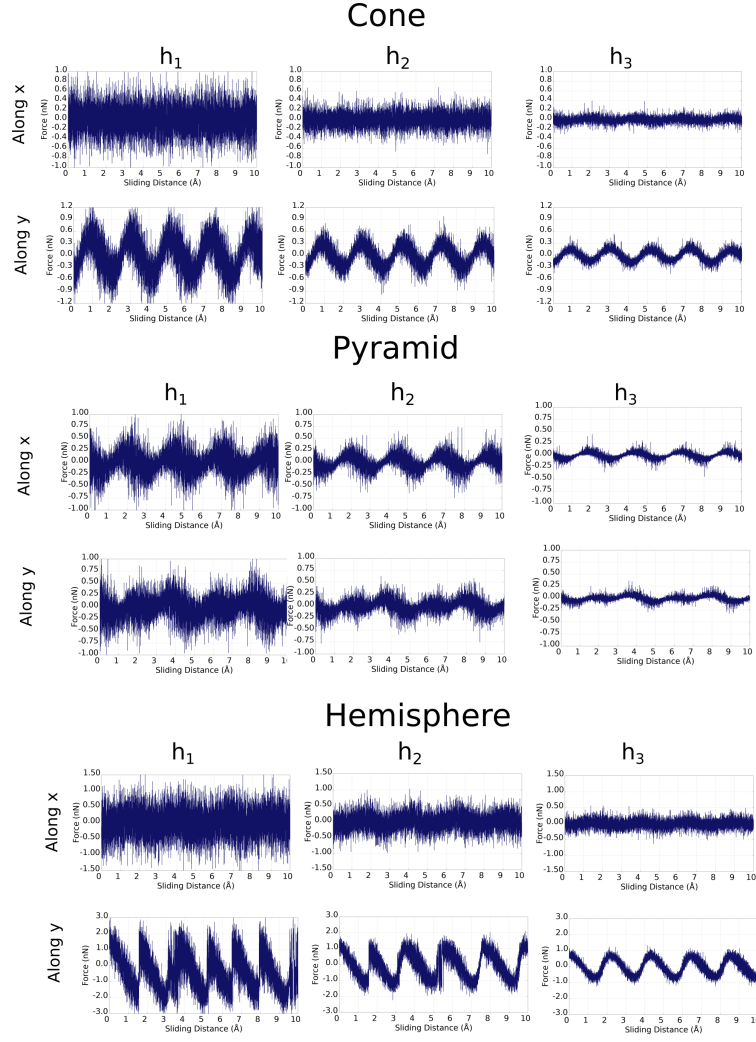

Figure S3: Lateral friction force as a function of sliding distance along the x and y directions at  $T=300$  K. From top to bottom, the forces for the rigid cone, the rigid pyramid and the rigid hemisphere are presented.
