# Supplementary material
Source: MDPI journal article supplement (https://www.mdpi.com/2075-4442/12/2/46)
Supplement: s1 [file s1]

Archive with 1 entries (1 files):
- lubricants-2804283-supplementary.pdf
